# Supplementary material for: Chemical Enhanced Backwashing for Controlling Organic Fouling in Drinking Water Treatment Using a Novel Hollow-Fiber Polyacrylonitrile Nanofiltration Membrane
Source: MDPI journal article supplement (doi:10.3390/app11156764), 2021-07-23
Supplement: s1 [file s1]

# Chemical Enhanced Backwashing for Controlling Organic Fouling in Drinking Water Treatment Using a Novel Hollow-Fiber Polyacrylonitrile Nanofiltration Membrane

Heejin Kim <sup>1,2</sup>, Intae Shim <sup>2</sup> and Min Zhan <sup>1,\*</sup>

<sup>1</sup> State Key Laboratory of Pollution Control and Resource Reuse, School of the Environment, Nanjing University, Nanjing 210023, China; hjkim1063@gmail.com

<sup>2</sup> Center of Research and Development, P&I HUMANKOREA, 167 Songpa-daero, Songpa-gu, Seoul 05855, Korea; nemocap1324@gmail.com

\* Correspondence: mzhan2020@nju.edu.cn; Tel.: +86-25-89680720

## Supplementary Materials

### Tables

**Table S1.** Membrane module characteristics and operating conditions

| PAN-NF Membrane            | Parameter               |
|----------------------------|-------------------------|
| Size of module             | Inner diameter: 0.8 mm  |
|                            | Out diameter: 1.55 mm   |
|                            | Length: 1 inch          |
| Configuration              | Inside-out hollow fiber |
| Nominal membrane size      | 582.0 cm <sup>2</sup>   |
| Nominal membrane pore size | 0.009 μm                |
| Membrane materials         | Polyacrylonitrile (PAN) |
| Operating pressure         | 5.0 bar                 |

PAN-NF: polyacrylonitrile-nanofiltration

**Table S2.** Parameters of raw water samples from a water-treatment plant at Jakarta, Indonesia

| Parameters                             | Concentration |
|----------------------------------------|---------------|
| TOC (mg/L)                             | 5.2           |
| DOC (mg/L)                             | 3.3           |
| UV <sub>254</sub> (cm <sup>-1</sup> )  | 7.0           |
| Hardness (as CaCO <sub>3</sub> , mg/L) | 46.8          |
| Ca <sup>2+</sup> (mg/L)                | 13.7          |
| SO <sub>4</sub> <sup>2-</sup> (mg/L)   | 17.7          |
| Na <sup>+</sup> (mg/L)                 | 12.8          |
| SS (mg/L)                              | 200           |

TOC: total organic carbon; DOC: dissolved organic carbon; UV<sub>254</sub>: Ultraviolet-visible light absorbance at a wavelength of 254 nm; SS: suspended solid

## Figures

### 1. Scanning electron microscopy (SEM) morphologies

The SEM morphologies of the PAN-NF HF membrane before and after modification are presented in Figure S1. The pristine PAN-UF HF membrane (Figure S1a and b) exhibits visible pores. The modified PAN-NF HF membrane (Figure S1c and d) shows the formation of a barrier layer to reduce the pore size of the membrane. The barrier layer reduced the pure water permeability of the PAN-NF HF membrane compared to the pristine HF membrane, thus contributing to better filtration efficiency.

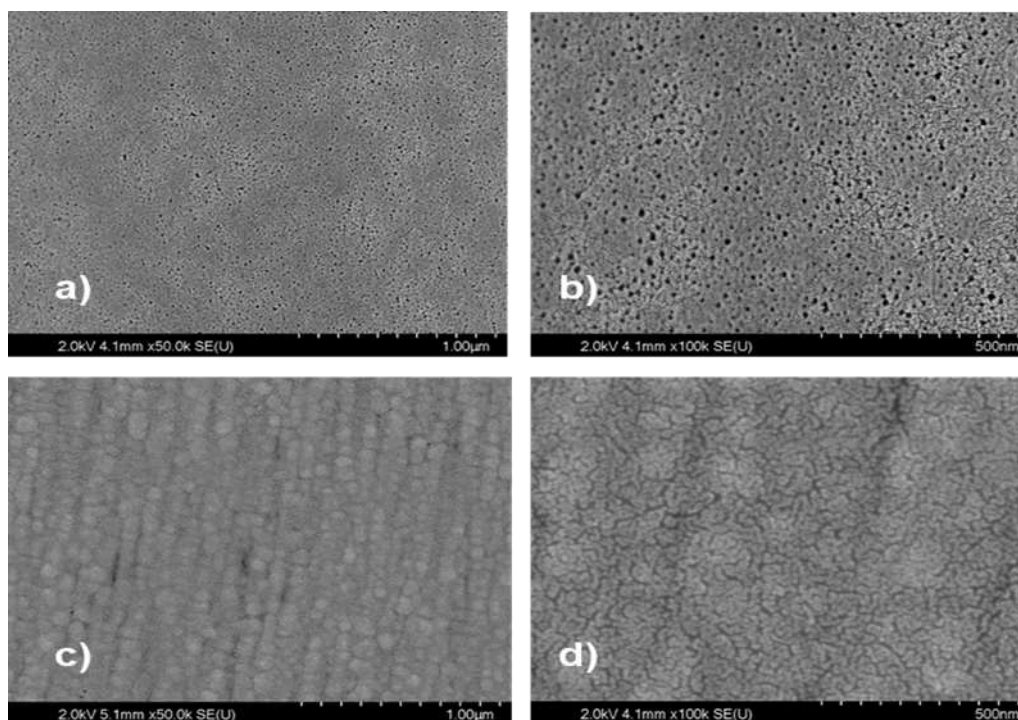

**Figure S1.** SEM images showing the inner surface morphology of (a) pristine PAN-UF HF membrane at a magnification of 1.0  $\mu\text{m}$ , (b) pristine PAN-UF HF membrane at a magnification of 500 nm, (c) novel PAN-NF HF membrane at a magnification of 1.0  $\mu\text{m}$ , and (d) novel PAN-NF HF membrane at a magnification of 500 nm.

### 2. Zeta potential of PAN-NF HF membrane

The charge of the PAN-NF HF membranes was determined in terms of the zeta potential. Figure S2 shows the variations in the zeta potentials of the pristine PAN-UF HF membrane and modified PAN-NF HF membrane. At all pH, the virgin PAN-NF HF membrane exhibits a stronger negative charge than the pristine PAN-UF HF membrane. As the pH increased from 3 to 10, the zeta potential of the PAN-NF HF membrane increased from  $-5$  to  $-32.8$  mV, while that of the pristine PAN-UF HF membrane increased from  $2$  to  $-20.68$  mV.

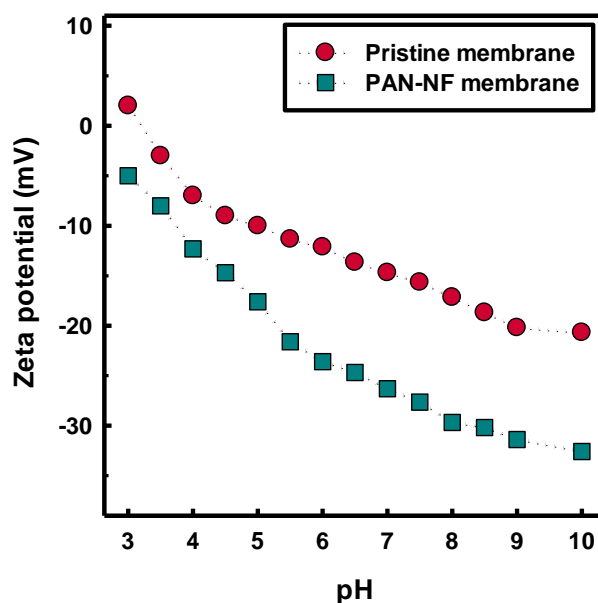

**Figure S2.** Variation in the zeta potential between the pristine and modified PAN-NF HF membrane.

### 3. Contact angle measurements

Figure S3 shows that the modified PAN-NF HF membrane exhibits slightly higher hydrophilicity than the pristine HF membrane. The water contact angle of the modified PAN-NF HF membrane is  $48.3^\circ$ , while that of the pristine membrane is  $58.5^\circ$ . Previous studies reported that a low water contact angle of the membrane surface indicates high hydrophilicity. The hydrophilic nature of the membrane surface results in strong fouling resistance, leading to reduced membrane fouling.

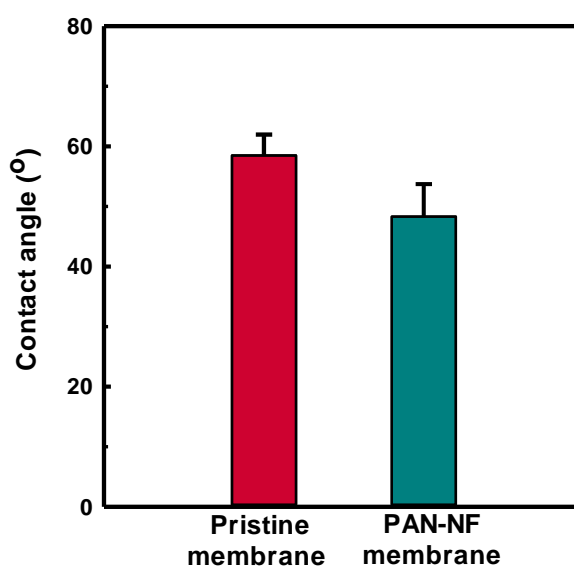

**Figure S3.** Water contact angles of the pristine and modified PAN-NF HF membranes.

#### 4. Application of CEB in the PAN-NF HF membrane

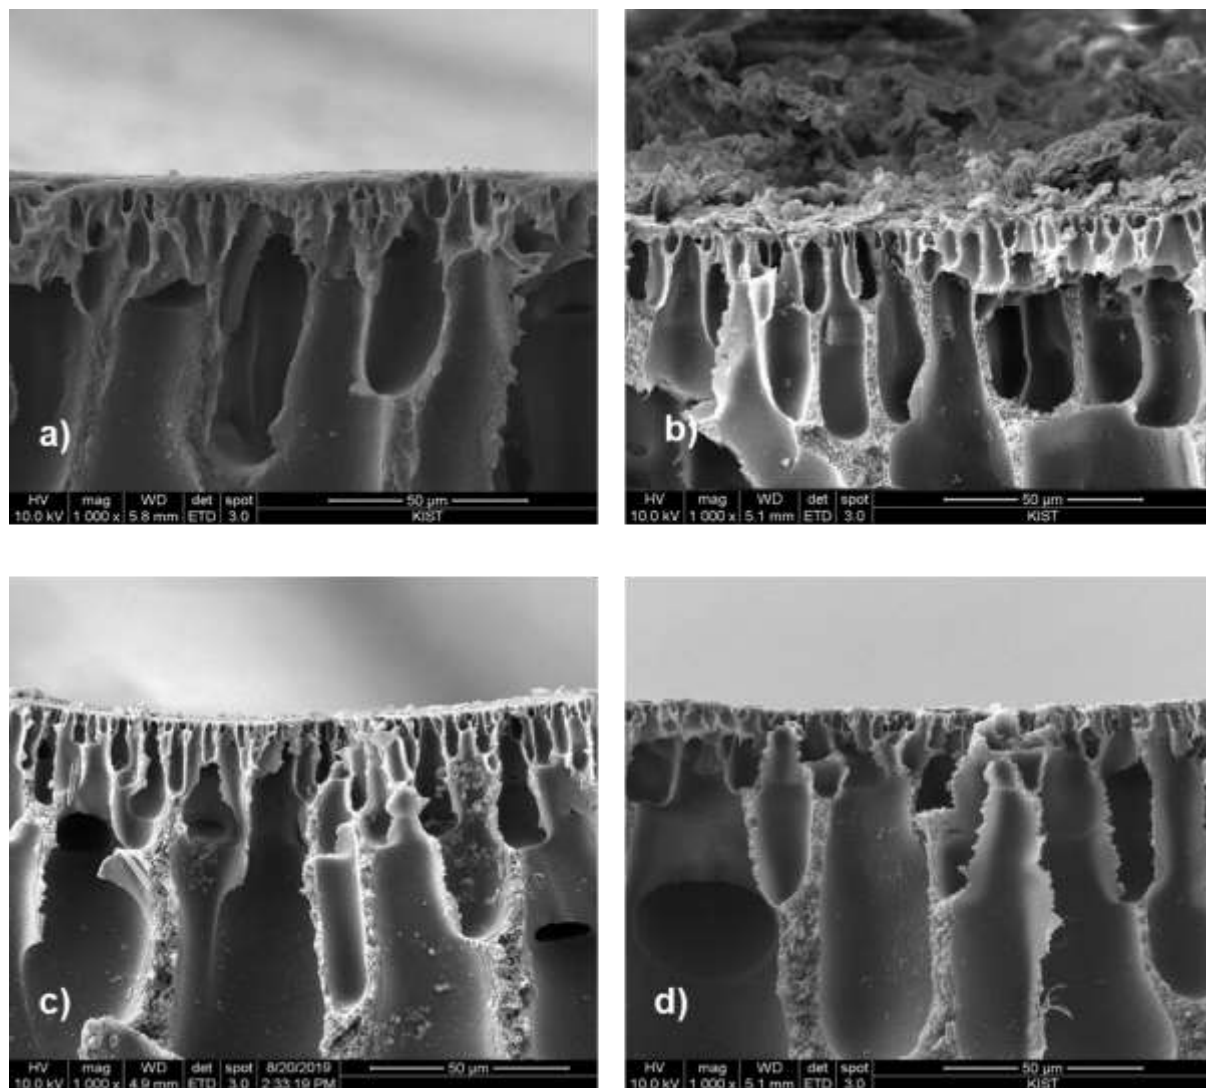

**Figure S4.** SEM images of the inner surfaces of the (a) virgin PAN-NF HF membrane, (b) PAN-NF HF membrane fouled by raw water from the water-treatment plant in Indonesia, (c) PAN-NF HF membrane after backwashing with 1 mg/L NaClO, and (d) PAN-NF HF membrane after backwashing with 10 mg/L NaClO.
